# Supplementary material for: Near full light absorption and full charge collection in 1-micron thick quantum dot photodetector using intercalated graphene monolayer electrodes
Source: Royal Society of Chemistry journal article supplement (doi:10.1039/c9nr09901h), 2020-01-01

# Near Full Light Absorption and Full Charge Collection in 1-micron Thick Quantum Dot Photodetector Using Intercalated Graphene Monolayers as Charge Collectors

*Wenjun Chen, Seungbae Ahn, Marquez Balingit, Jiaying Wang, Malcolm Lockett, Oscar Vazquez-Mena\**

## Content

- S1: Penetration depth of light in QD films
- S2: Time constants in photodetector time response
- S3: Photogain and EQE Calculations
- S4: Absorption spectra as function of thickness
- S5: Dark current traces and noise levels

## FIGURE S1

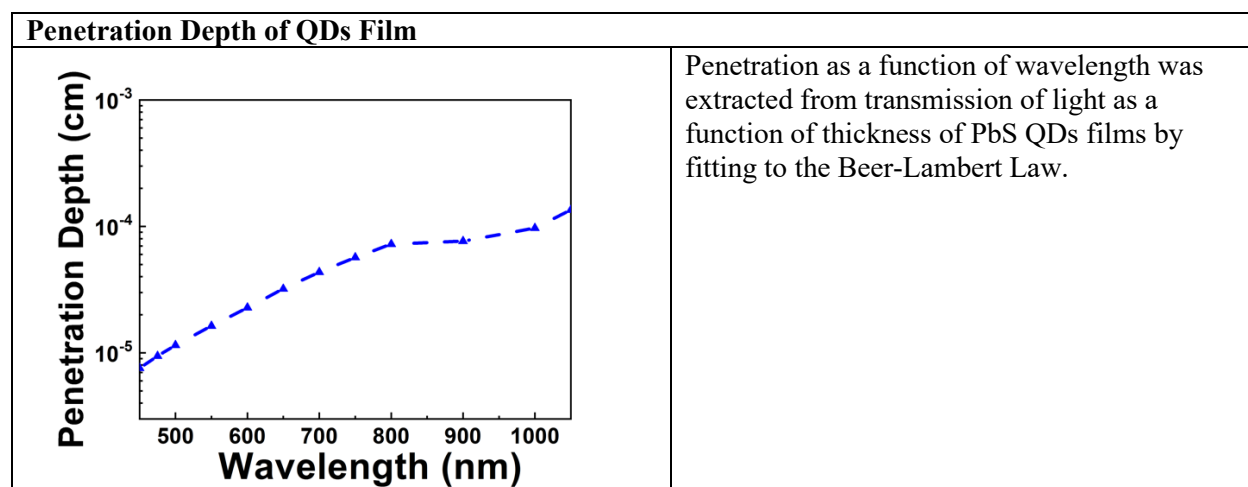

**FIGURE S2**

**Time Constants**

The time response fits best to a double exponential with a  $\tau_{fast}$  and  $\tau_{slow}$  as reported previously (Nat Nano 2012, 7, 363-368)

$t = 1000 \text{ nm}, D_{Gr} = 100 \text{ nm}$   
 $\tau_{fast} = 0.07 \text{ s}$  and  $\tau_{slow} = 3.18 \text{ s}$ .

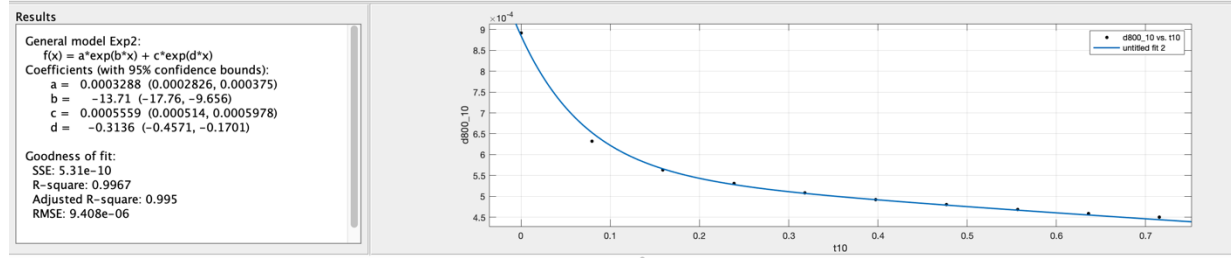

$t = 400 \text{ nm}, D_{Gr} = 100 \text{ nm}$   
 $\tau_{fast} = 0.08 \text{ s}$  and  $\tau_{slow} = 4.35 \text{ s}$ .

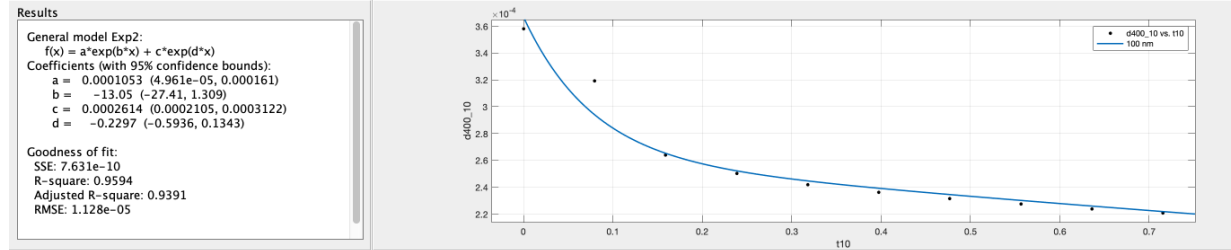

$t = 200 \text{ nm}, D_{Gr} = 100 \text{ nm}$   
 $\tau_{fast} = 0.07 \text{ s}$  and  $\tau_{slow} = 4.17 \text{ s}$ .

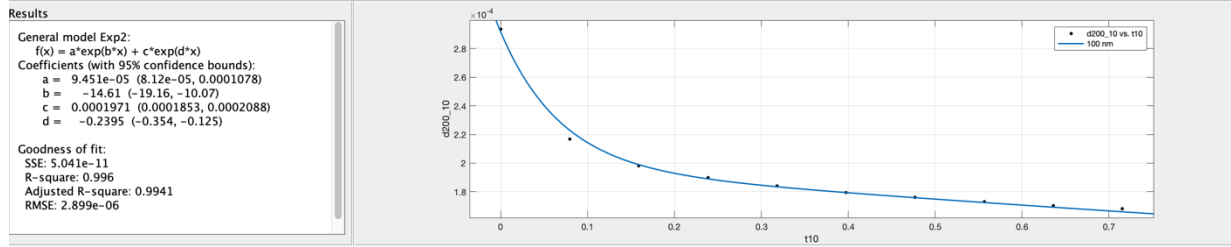

$t = 100 \text{ nm}, D_{Gr} = 100 \text{ nm}$   
 $\tau_{fast} = 0.08 \text{ s}$  and  $\tau_{slow} = 4.36 \text{ s}$ .

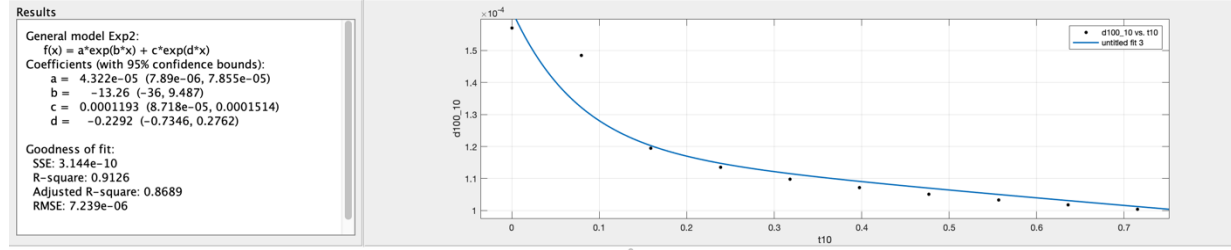

**PANEL S3:**

|                                                                                                                                                                                                                                                                                                                                                                                                                                                                                                                                                                                                                                                                                                                                                                                                                                                                                                |
|------------------------------------------------------------------------------------------------------------------------------------------------------------------------------------------------------------------------------------------------------------------------------------------------------------------------------------------------------------------------------------------------------------------------------------------------------------------------------------------------------------------------------------------------------------------------------------------------------------------------------------------------------------------------------------------------------------------------------------------------------------------------------------------------------------------------------------------------------------------------------------------------|
| <p><b>Photogain and EQE Calculations</b></p> <p>Based on: ACS Photonics 2016, 3, 2197-2210</p> <p><i>Photogain (G)</i></p> $G = \frac{\tau_{lifetime}}{\tau_{transit}} = \frac{\tau_{lifetime}}{L^2} \mu V_{DS}$ <p>Using <math>L=1</math> mm, <math>\mu_h \sim 400</math> cm<sup>2</sup>/Vs, <math>V_{DS}=10</math> mV and <math>\tau_{lifetime}=3.1</math> sec</p> $G = 1.33 \times 10^3$ <p><i>External Quantum Efficiency (QE)</i></p> $EQE = R \frac{hc}{q\lambda G}$ <p>This expression is used to obtain EQE in Figure 3.c from <math>R</math> in Figure 3.b using <math>G = 1.33 \times 10^3</math>.</p> <p>We use the long lifetime since the data for <math>R</math> was obtained with an integration time of 15 s. The high photogain is also associated with long lifetime in QDs in the order of <math>\sim 1</math> sec due to traps in the QDs. (Nat Nano 2012, 7, 363-368)</p> |
|------------------------------------------------------------------------------------------------------------------------------------------------------------------------------------------------------------------------------------------------------------------------------------------------------------------------------------------------------------------------------------------------------------------------------------------------------------------------------------------------------------------------------------------------------------------------------------------------------------------------------------------------------------------------------------------------------------------------------------------------------------------------------------------------------------------------------------------------------------------------------------------------|

**FIGURE S4**

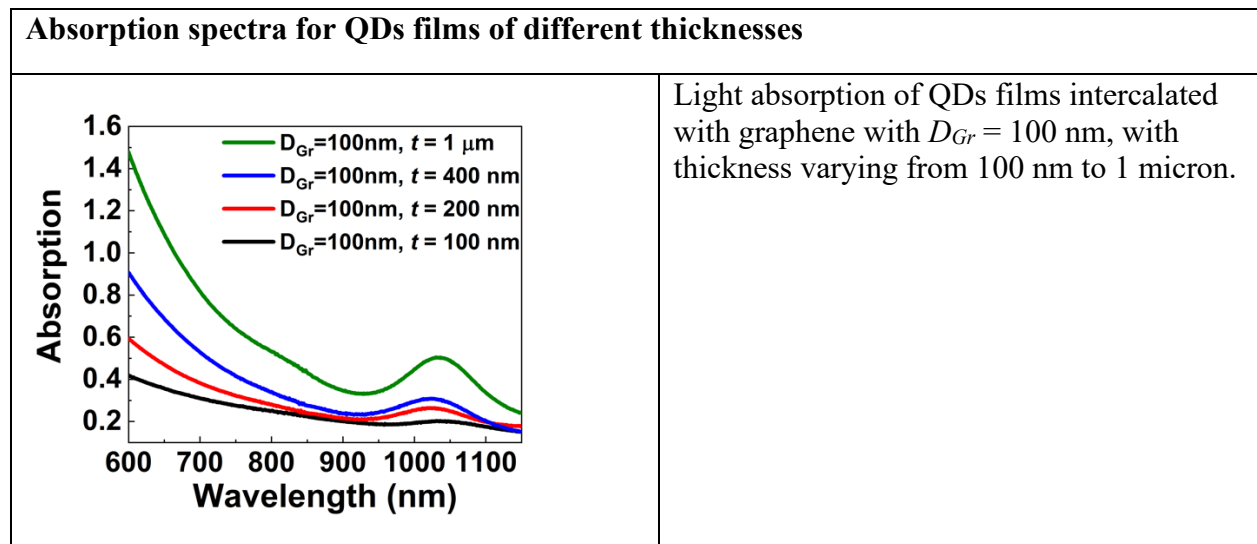

**FIGURE S5**

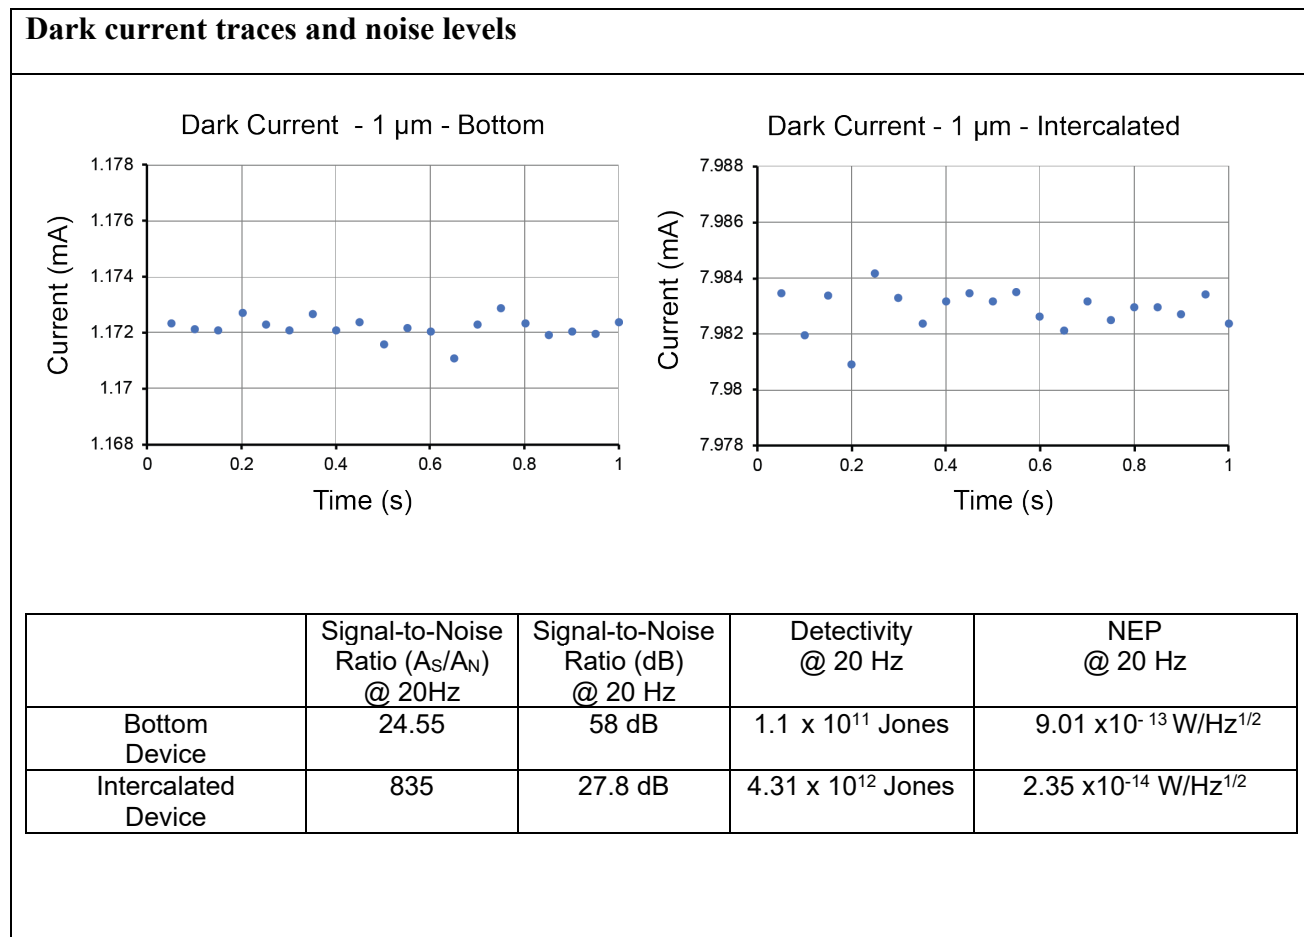

Supplement: c9nr09901h1.pdf [file c9nr09901h1.pdf]
